# Supplementary material for: The GluA1 cytoplasmic tail regulates intracellular AMPA receptor trafficking and synaptic transmission onto dentate gyrus GABAergic interneurons, gating response to novelty
Source: PubMed Central journal article supplement — bioRxiv. 2024 Dec 1:2024.12.01.626277. Preprint. [Version 1] doi: 10.1101/2024.12.01.626277 (PMC11643017; doi:10.1101/2024.12.01.626277), 2024-12-01

## Open field

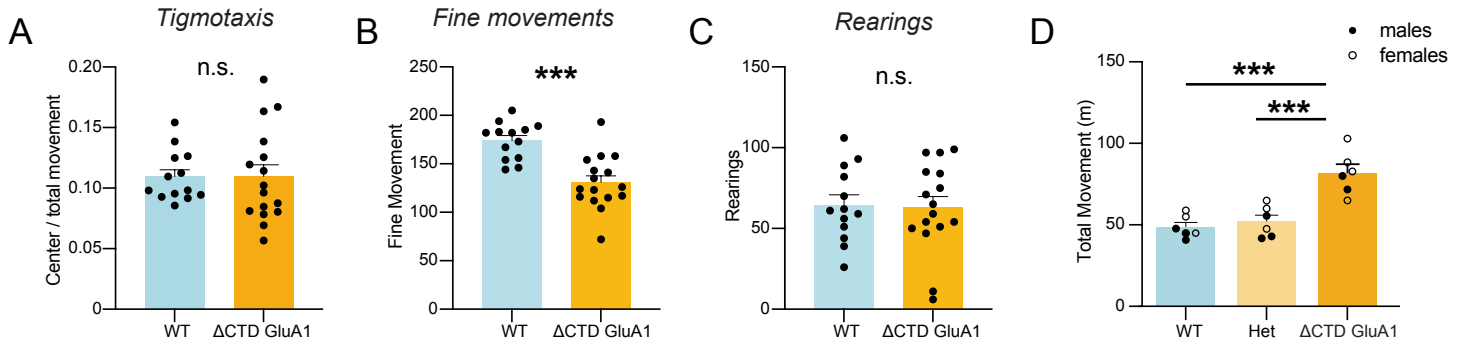

## Object location memory test

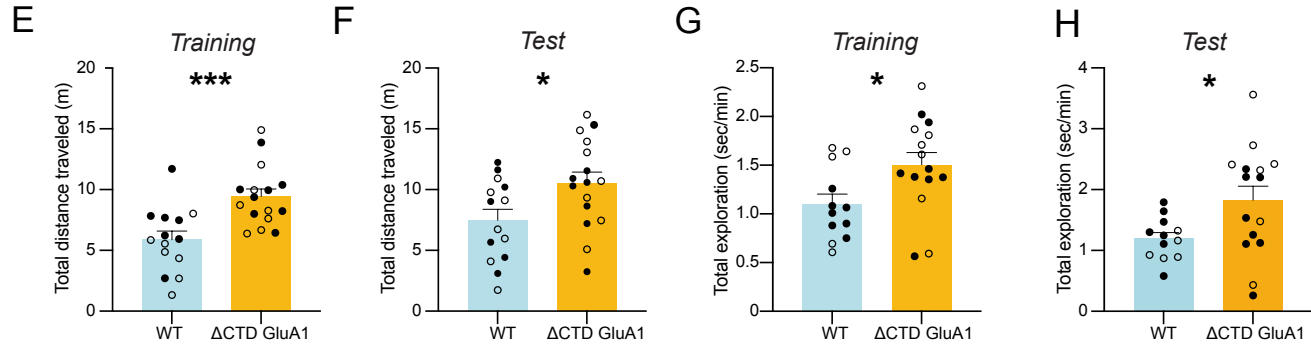

## Novel object recognition test

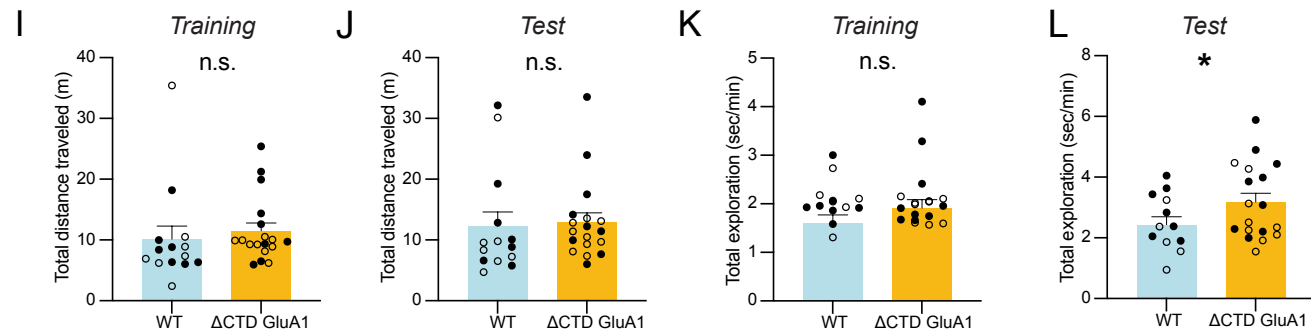

## Object location memory test

## Hot plate test

## Contextual fear conditioning

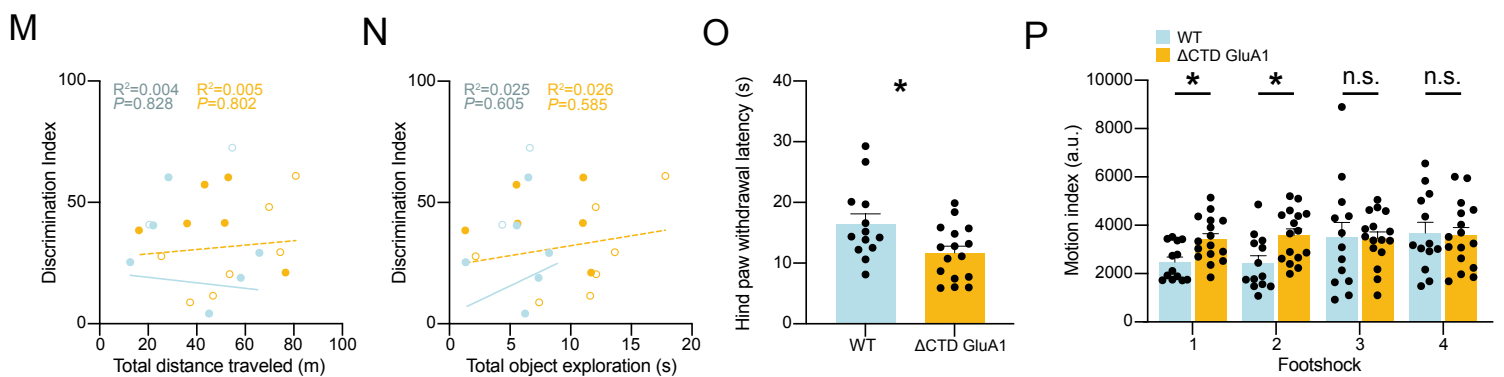

## CFC

## Fear generalization test

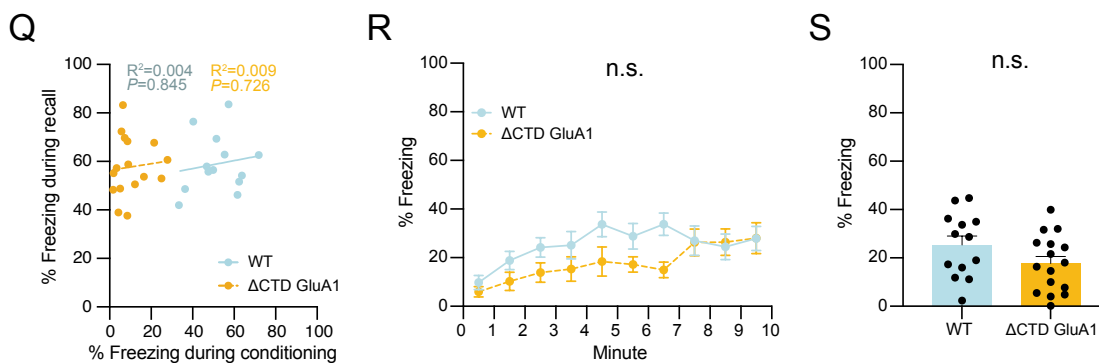

Supplement: media-2.pdf [file media-2.pdf]
