# Supplementary material for: The GluA1 cytoplasmic tail regulates intracellular AMPA receptor trafficking and synaptic transmission onto dentate gyrus GABAergic interneurons, gating response to novelty
Source: PubMed Central journal article supplement — bioRxiv. 2024 Dec 1:2024.12.01.626277. Preprint. [Version 1] doi: 10.1101/2024.12.01.626277 (PMC11643017; doi:10.1101/2024.12.01.626277), 2024-12-01

# Elevated plus maze

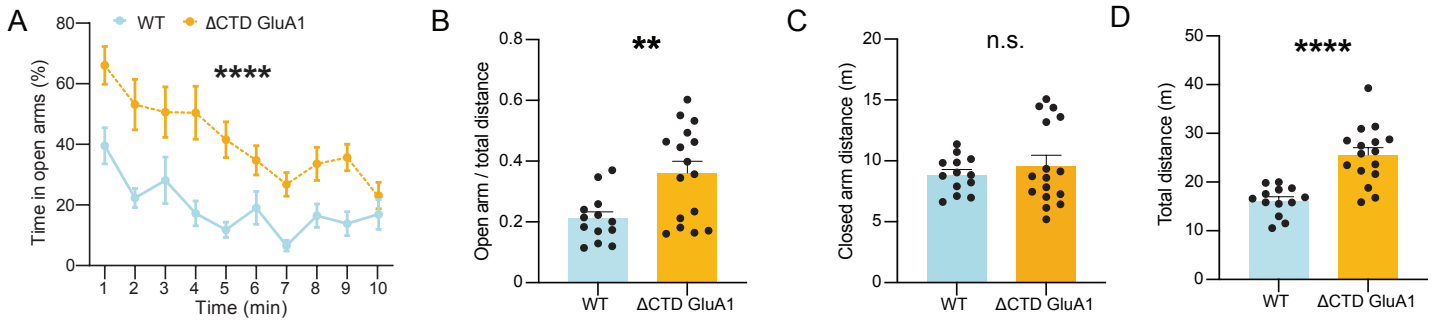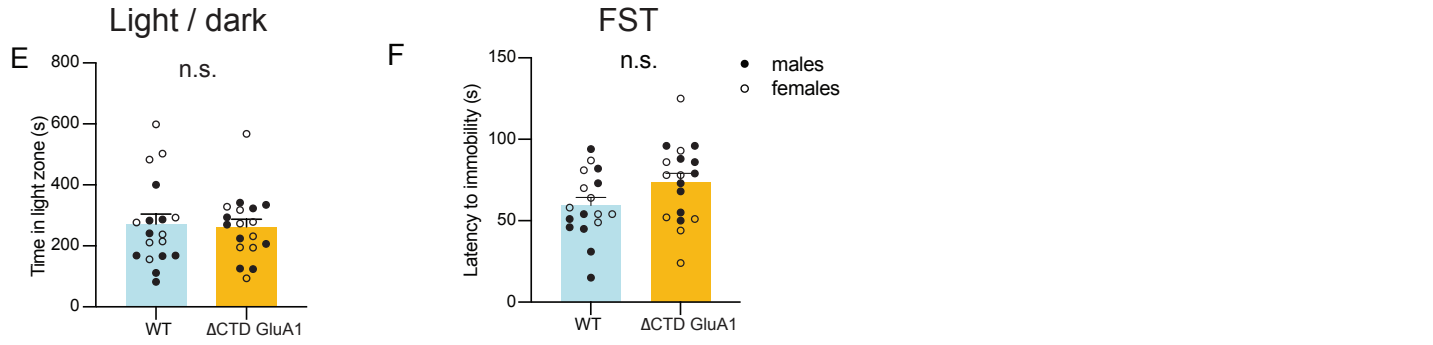

Supplement: media-4.pdf [file media-4.pdf]
